# Supplementary material for: A rational design for an efficient synthesis of a monomeric tin(ii) hydroxide
Source: Royal Society of Chemistry journal article supplement (doi:10.1039/b920306k), 2009-12-17
Supplement: b920306k.pdf [file b920306k.pdf]

## Supporting Information

For

### **A Rational Design for an Efficient Synthesis of a Monomeric Tin(II) Hydroxide**

Anukul Jana, Sankaranarayana Pillai Sarish, Herbert W. Roesky,\* Carola Schulzke and  
Prinson P. Samuel

#### (1) Experimental details and physical data

All manipulations were performed in a dry and oxygen-free atmosphere (N<sub>2</sub> or Ar) by using Schlenk-line and glove-box techniques. Solvents were purified with the M-Braun solvent drying system.

**2: Preparation of LSn(NMe<sub>2</sub>)Fe(CO)<sub>4</sub> (2).** A flask was charged with **1** (5.80 g, 10.00 mmol) and Fe<sub>2</sub>(CO)<sub>9</sub> (3.70 g, 10.20 mmol) in THF (140 mL). The solution was stirred for 24 h at ambient temperature. The byproduct was removed by filtration of the solution over celite, resulting in a clear pale brown filtrate. From the resulting solution the volatiles were removed, giving a pale brown solid. Crystallization of the crude product was attained by saturated THF solution of **2** and keeping it at -30 °C temperature in a freezer. **2** deposited as pale orange crystals with a composition of **2**·0.5THF. Yield: 6.35 g (85%). Mp: 218 °C dec. IR (KBr pellet):  $\tilde{\nu}$  = 2034 s, 1957 s, 1935 s (CO) cm<sup>-1</sup>. <sup>1</sup>H NMR (300.13 MHz, C<sub>6</sub>D<sub>6</sub>, 25 °C):  $\delta$  7.07-7.16 (m, 6H, ArH), 4.75 (s, 1H;  $\gamma$ -CH), 3.27 (sept, 2H, CH(CH<sub>3</sub>)<sub>2</sub>), 3.15 (sept, 2H, CH(CH<sub>3</sub>)<sub>2</sub>), 2.8-3.1 (br, 6H, N(CH<sub>3</sub>)<sub>2</sub>), 1.49 (s, 6H, CH<sub>3</sub>), 1.42 (d, 6H, CH(CH<sub>3</sub>)<sub>2</sub>), 1.32 (d, 6H, CH(CH<sub>3</sub>)<sub>2</sub>), 1.21 (d, 6H, CH(CH<sub>3</sub>)<sub>2</sub>), 1.01 (d, 6H, CH(CH<sub>3</sub>)<sub>2</sub>) ppm. <sup>13</sup>C NMR (75.46 MHz, C<sub>6</sub>D<sub>6</sub>, 25 °C):  $\delta$  216.40 (CO), 169.47 (CN), 144.86, 143.33, 141.09, 125.49, 124.74 (ArC), 99.26 ( $\gamma$ -C), 45.5-42.8 (br, N(CH<sub>3</sub>)<sub>2</sub>), 29.75 (CH<sub>3</sub>), 28.21 (CH(CH<sub>3</sub>)<sub>2</sub>), 25.26 (CH(CH<sub>3</sub>)<sub>2</sub>), 24.94 (CH(CH<sub>3</sub>)<sub>2</sub>), 24.65 (CH(CH<sub>3</sub>)<sub>2</sub>), 24.44 (CH(CH<sub>3</sub>)<sub>2</sub>), 24.25 (CH(CH<sub>3</sub>)<sub>2</sub>) ppm. <sup>119</sup>Sn NMR (111.92 MHz, C<sub>6</sub>D<sub>6</sub>, 25 °C):  $\delta$  94.00 ppm. EI-MS (70 eV; *m/z* (%)): 749 (45) [M]<sup>+</sup>, 705 (100) [M - NMe<sub>2</sub>]<sup>+</sup>. Anal. Calcd for C<sub>35</sub>H<sub>47</sub>FeN<sub>3</sub>O<sub>4</sub>Sn (749.19): C, 56.18; H, 6.33; N, 5.62. Found: C, 56.24; H, 6.78; N, 5.51 (under vacuum THF is completely removed).

**3: Preparation of LSn(OH)Fe(CO)<sub>4</sub> (3).** Degassed water (72  $\mu$ L, 4.00 mmol) was added to a solution of **2** (3.00 g, 4.00 mmol) in THF (50 mL) at -60 °C. Then, it was taken to room temperature and stirred for 1 h. Followed by removal of the solvent in a vacuum to give compound **3**. **3** was washed with a small amount of *n*-hexane and crystallized from toluene at -32 °C to exhibit compound **3** as brown crystals. Yield: 2.10 g (73%). Mp: 233 °C dec. IR (KBr pellet):  $\tilde{\nu}$  = 3615 s (OH), 2038 s, 1959 s, 1944 s (CO)  $\text{cm}^{-1}$ . <sup>1</sup>H NMR (300.13 MHz, C<sub>6</sub>D<sub>6</sub>, 25 °C):  $\delta$  7.04-7.15 (m, 6H, ArH), 4.86 (s, 1H;  $\gamma$ -CH), 3.75 (sept, 2H, CH(CH<sub>3</sub>)<sub>2</sub>), 3.07 (sept, 2H, CH(CH<sub>3</sub>)<sub>2</sub>), 1.66 (s, 1H; OH), 1.51 (s, 6H; CH<sub>3</sub>), 1.39 (d, 6H, CH(CH<sub>3</sub>)<sub>2</sub>), 1.34 (d, 6H, CH(CH<sub>3</sub>)<sub>2</sub>), 1.18 (d, 6H, CH(CH<sub>3</sub>)<sub>2</sub>), 1.04 (d, 6H, CH(CH<sub>3</sub>)<sub>2</sub>) ppm. <sup>13</sup>C NMR (75.46 MHz, C<sub>6</sub>D<sub>6</sub>, 25 °C):  $\delta$  213.15 (CO), 169.68 (CN), 145.01, 143.15, 139.96, 125.32, 124.85, 123.54 (ArC), 100.23 ( $\gamma$ -C), 29.39 (CH<sub>3</sub>), 27.93 (CH(CH<sub>3</sub>)<sub>2</sub>), 25.59 (CH(CH<sub>3</sub>)<sub>2</sub>), 24.51 (CH(CH<sub>3</sub>)<sub>2</sub>), 24.44 (CH(CH<sub>3</sub>)<sub>2</sub>), 24.08 (CH(CH<sub>3</sub>)<sub>2</sub>), 23.39 (CH(CH<sub>3</sub>)<sub>2</sub>) ppm. <sup>119</sup>Sn NMR (111.92 MHz, C<sub>6</sub>D<sub>6</sub>, 25 °C):  $\delta$  45.03 ppm. EI-MS (70 eV; *m/z* (%)): 722 (10) [M]<sup>+</sup>, 705 (100) [M - OH]<sup>+</sup>, 666 (85) [M - 2CO]<sup>+</sup>. Anal. Calcd for C<sub>33</sub>H<sub>42</sub>FeN<sub>2</sub>O<sub>5</sub>Sn (722.15): C, 54.95; H, 5.87; N, 3.88. Found: C, 55.61; H, 6.43; N, 4.17.

## (2) X-ray crystallography

Suitable crystals of **2**·0.5THF and **3** were mounted on a glass fiber and data was collected on an IPDS II Stoe image-plate diffractometer (graphite monochromated Mo K $\alpha$  radiation,  $\lambda$  = 0.71073 Å) at 133(2) K. The data was integrated with X-Area. The structures were solved by Direct Methods (SHELXS-97)<sup>S1</sup> and refined by full-matrix least square methods against  $F^2$  (SHELXL-97).<sup>S1</sup> All non-hydrogen atoms were refined with anisotropic displacement parameters. The hydrogen atoms were refined isotropically on calculated positions using a riding model. Complete crystallographic data are deposited at the Cambridge Crystallographic Data Centre, where it can be downloaded free of charge from [www.ccdc.cam.ac.uk/data\\_request/cif](http://www.ccdc.cam.ac.uk/data_request/cif): at CCDC-740971 for (**2**·0.5THF) and 740972 for (**3**).

### Crystallographic data for [LSn(NMe<sub>2</sub>)Fe(CO)<sub>4</sub>]<sub>2</sub>·THF

|                                                     |                                                                                                |
|-----------------------------------------------------|------------------------------------------------------------------------------------------------|
| Empirical formula                                   | C <sub>74</sub> H <sub>102</sub> Fe <sub>2</sub> N <sub>6</sub> O <sub>9</sub> Sn <sub>2</sub> |
| Formula weight                                      | 1568.70                                                                                        |
| Temperature                                         | 133(2) K                                                                                       |
| Wavelength                                          | 0.71073 Å                                                                                      |
| Crystal system                                      | monoclinic                                                                                     |
| Space group                                         | <i>P</i> 2 <sub>1</sub> / <i>c</i>                                                             |
| Unit cell dimensions                                | <i>a</i> = 17.298(4) Å                                                                         |
|                                                     | <i>b</i> = 20.371(4) Å <i>β</i> = 94.33(3)°                                                    |
|                                                     | <i>c</i> = 21.502(4) Å                                                                         |
| Volume                                              | 7555(3) Å <sup>3</sup>                                                                         |
| <i>Z</i>                                            | 4                                                                                              |
| Density (calculated)                                | 1.379 Mg/m <sup>3</sup>                                                                        |
| Absorption coefficient                              | 1.087 mm <sup>-1</sup>                                                                         |
| <i>F</i> (000)                                      | 3248                                                                                           |
| Crystal size                                        | 0.50 x 0.21 x 0.16 mm <sup>3</sup>                                                             |
| <i>θ</i> range for data collection                  | 1.18 to 25.93°                                                                                 |
| Index ranges                                        | -21 ≤ <i>h</i> ≤ 21, -24 ≤ <i>k</i> ≤ 24, -26 ≤ <i>l</i> ≤ 26                                  |
| Reflections collected                               | 60413                                                                                          |
| Independent Reflections                             | 14600 ( <i>R</i> <sub>int</sub> = 0.0693)                                                      |
| Completeness to <i>θ</i> = 25.93°                   | 98.9 %                                                                                         |
| Refinement method                                   | Full-matrix least-squares on <i>F</i> <sup>2</sup>                                             |
| Data / restraints / parameters                      | 14600/0/862                                                                                    |
| Goodness-of-fit on <i>F</i> <sup>2</sup>            | 1.130                                                                                          |
| Final <i>R</i> indices [ <i>I</i> > 2σ( <i>I</i> )] | <i>R</i> 1 = 0.0316, <i>wR</i> 2 = 0.0835                                                      |
| <i>R</i> indices (all data)                         | <i>R</i> 1 = 0.0441, <i>wR</i> 2 = 0.0863                                                      |
| Largest diff. peak and hole                         | 0.988 and -0.705 e.Å <sup>-3</sup>                                                             |

## Crystallographic data for $\text{LSn(OH)Fe(CO)}_4$

|                                        |                                                              |
|----------------------------------------|--------------------------------------------------------------|
| Empirical formula                      | $\text{C}_{33}\text{H}_{42}\text{FeN}_2\text{O}_5\text{Sn}$  |
| Formula weight                         | 721.23                                                       |
| Temperature                            | 133(2) K                                                     |
| Wavelength                             | 0.71073 Å                                                    |
| Crystal system                         | monoclinic                                                   |
| Space group                            | $P2_1/n$                                                     |
| Unit cell dimensions                   | $a = 16.132(3)$ Å                                            |
|                                        | $b = 10.002(2)$ Å $\beta = 96.62(3)^\circ$                   |
|                                        | $c = 20.437(4)$ Å                                            |
| Volume                                 | $3275.7(11)$ Å <sup>3</sup>                                  |
| Z                                      | 4                                                            |
| Density (calculated)                   | 1.462 Mg/m <sup>3</sup>                                      |
| Absorption coefficient                 | 1.246 mm <sup>-1</sup>                                       |
| $F(000)$                               | 1480                                                         |
| Crystal size                           | 0.11 x 0.09 x 0.08 mm <sup>3</sup>                           |
| $\theta$ range for data collection     | 1.53 to 26.00 <sup>0</sup>                                   |
| Index ranges                           | $-19 \leq h \leq 18, -12 \leq k \leq 12, -24 \leq l \leq 25$ |
| Reflections collected                  | 27077                                                        |
| Independent Reflections                | 6328 ( $R_{\text{int}} = 0.0517$ )                           |
| Completeness to $\theta = 26.00^\circ$ | 98.3 %                                                       |
| Refinement method                      | Full-matrix least-squares on $F^2$                           |
| Data / restraints / parameters         | 6328/0/390                                                   |
| Goodness-of-fit on $F^2$               | 1.079                                                        |
| Final $R$ indices [ $I > 2\sigma(I)$ ] | $R1 = 0.0388, wR2 = 0.0728$                                  |
| $R$ indices (all data)                 | $R1 = 0.0556, wR2 = 0.0775$                                  |
| Largest diff. peak and hole            | 0.840 and -0.560 e.Å <sup>-3</sup>                           |

S1 G. M. Sheldrick, *Acta Crystallogr. Sect. A*, 2008, **64**, 112-122.
